# Supplementary material for: Structurally distinct Mre11 domains mediate MRX functions in resection, end-tethering and DNA damage resistance
Source: PubMed Central journal article supplement — Nucleic Acids Res. 2018 Feb 6;46(6):2990–3008. doi: 10.1093/nar/gky086 (PMC5888019; doi:10.1093/nar/gky086), 2018-02-06
Supplement: gky086_supp.pdf [file gky086_supp.pdf]

A

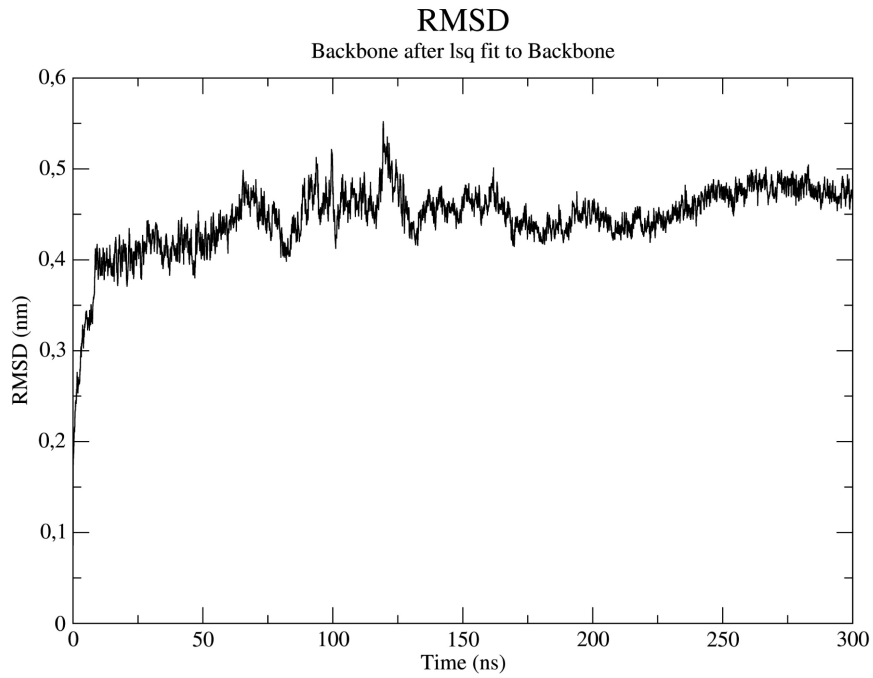

B

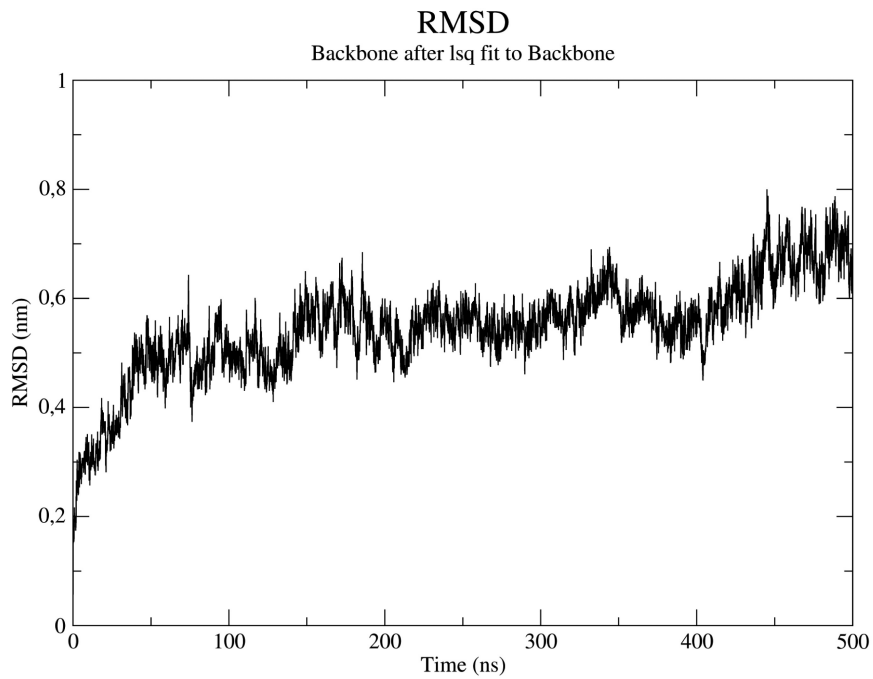



Supplementary Figure S3

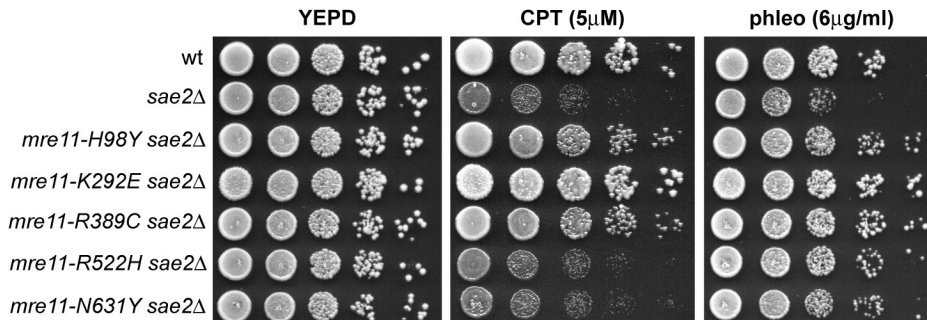

Supplementary Figure S4

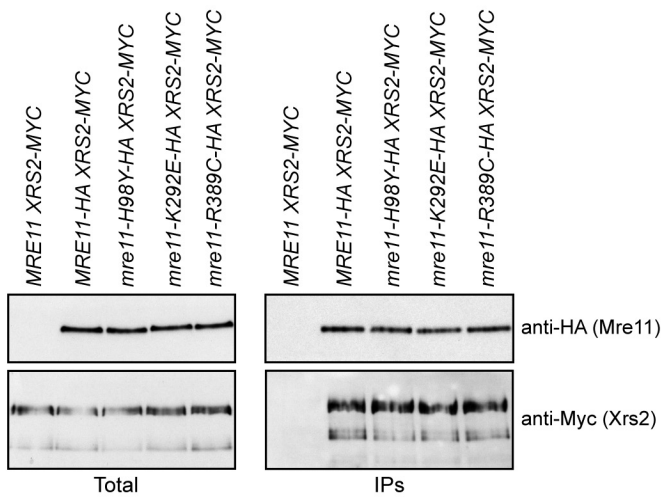



## H98-A Vs chain A

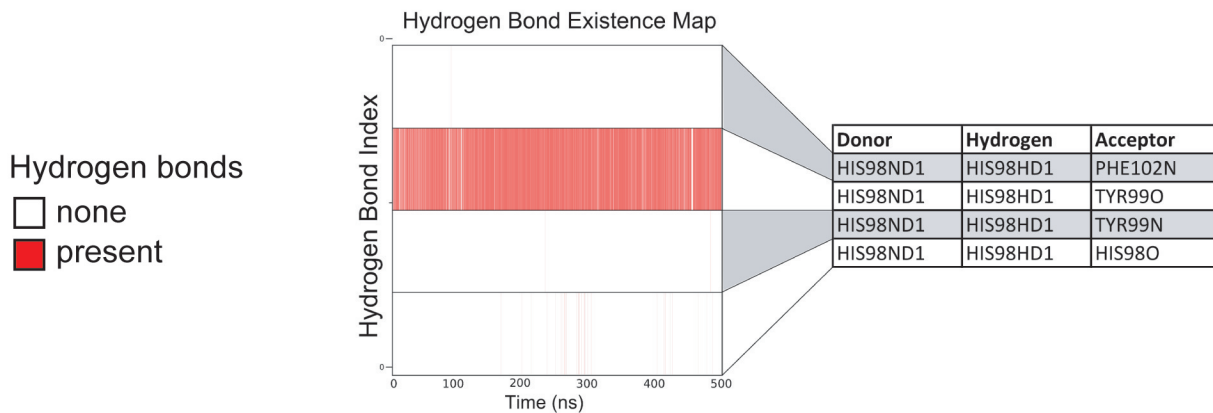

## H98-B Vs chain B

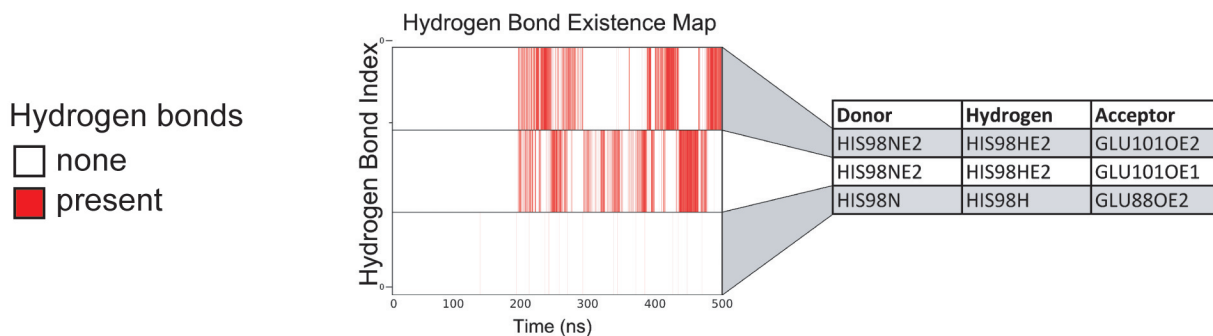

## H98-B Vs chain A

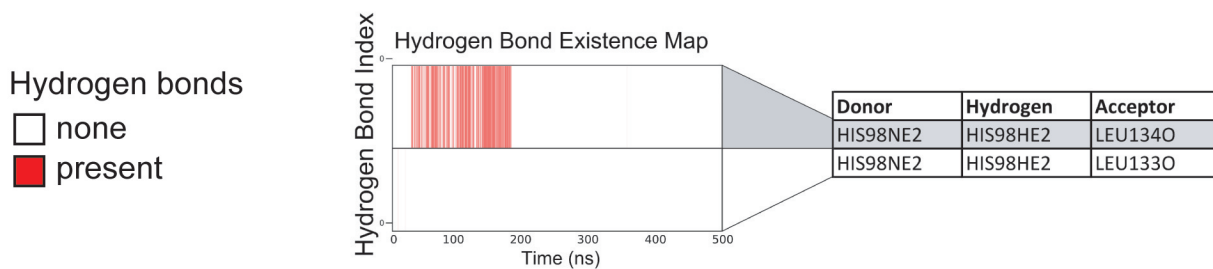

## K292-A Vs chain A

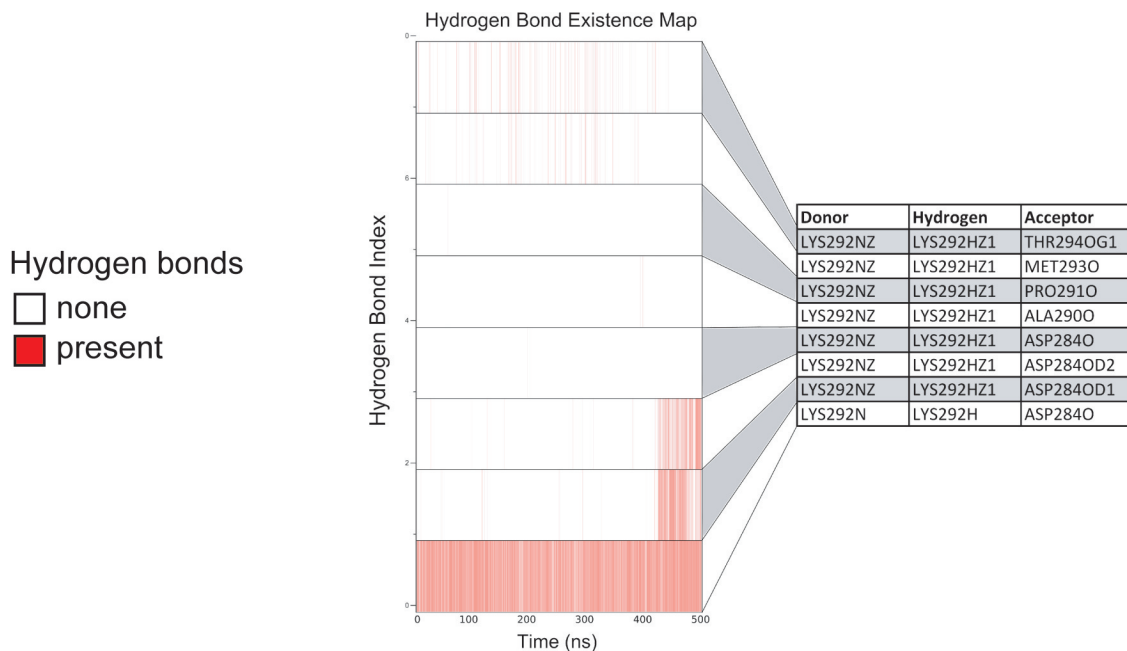

## K292-B Vs chain B

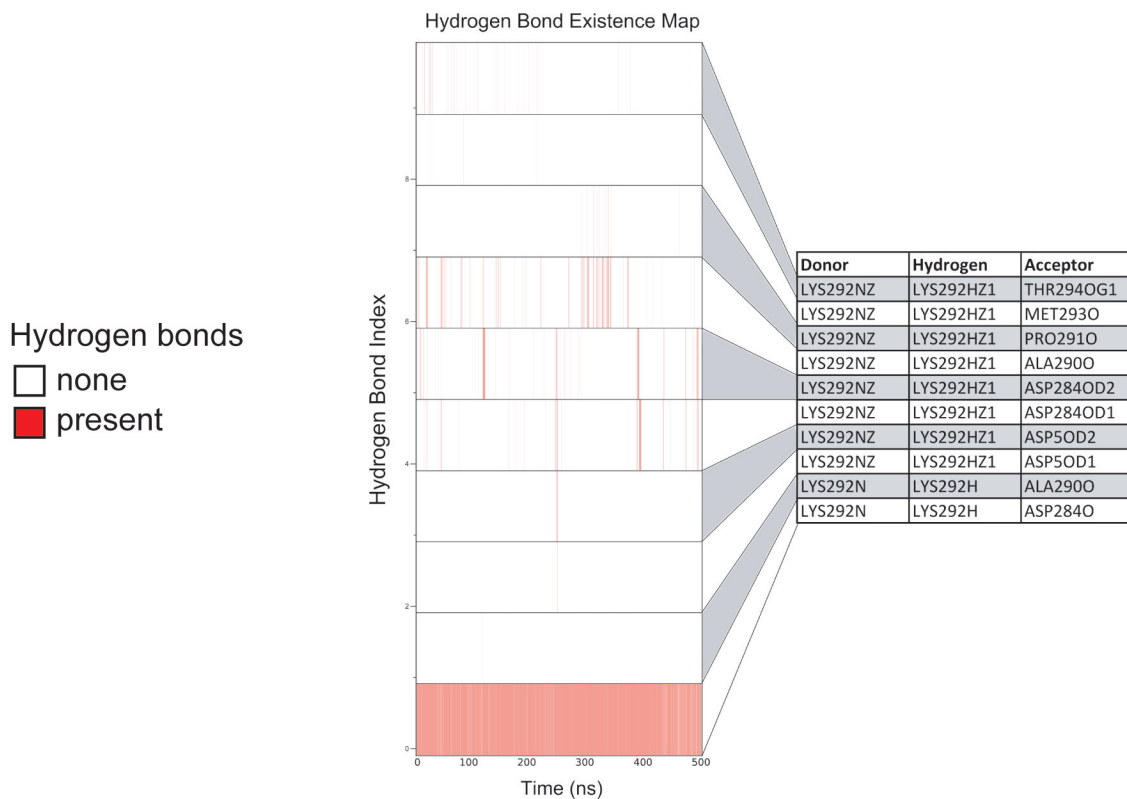

### H98 Salt bridge

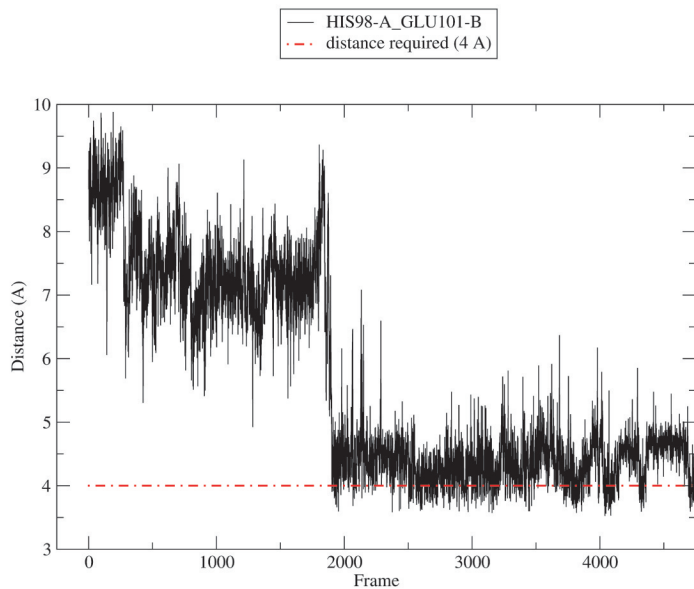

### R389 Salt bridge

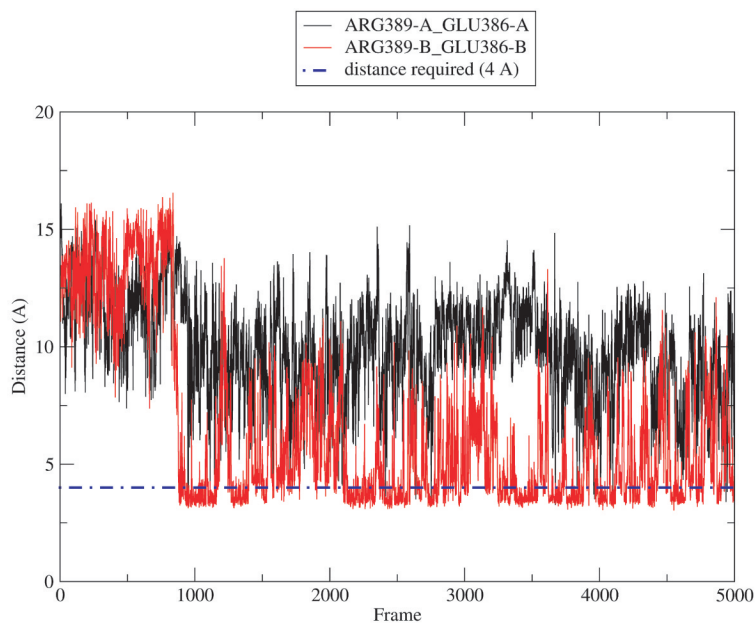

## R389-A Vs chain A

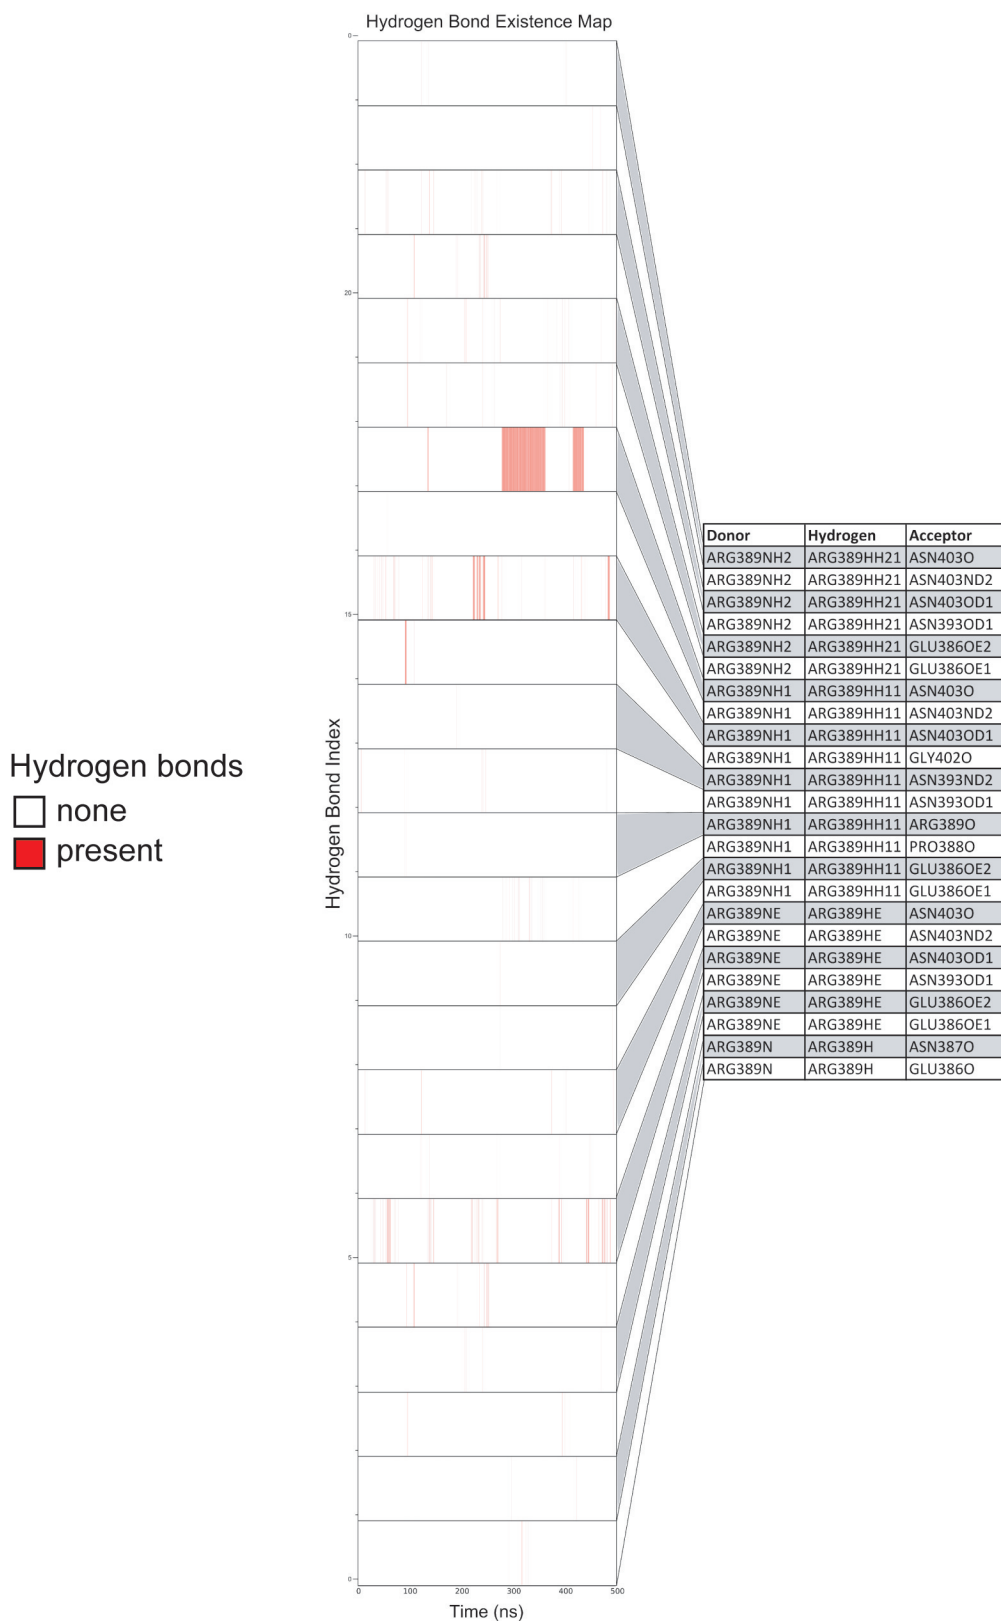

R389-B Vs chain B

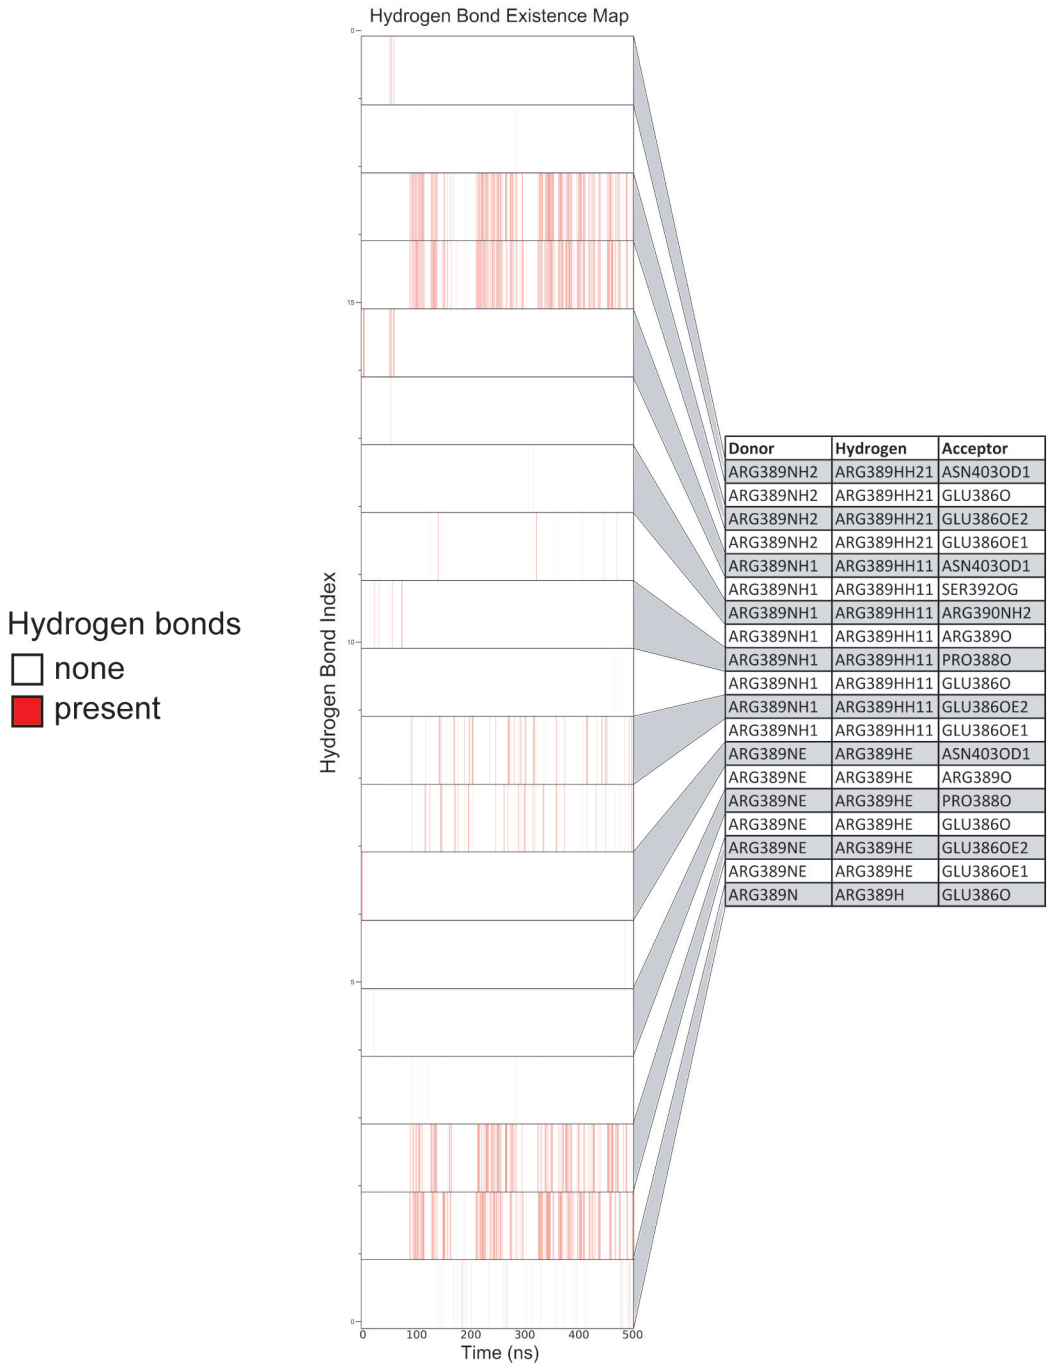

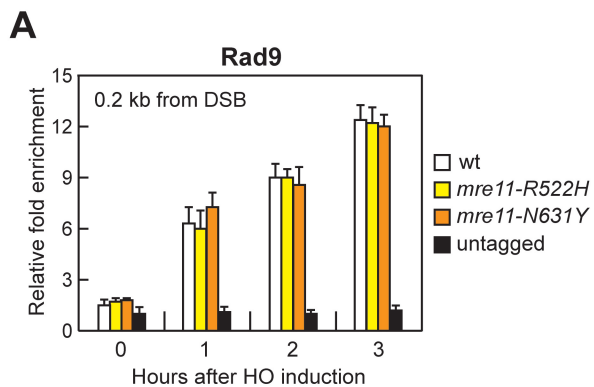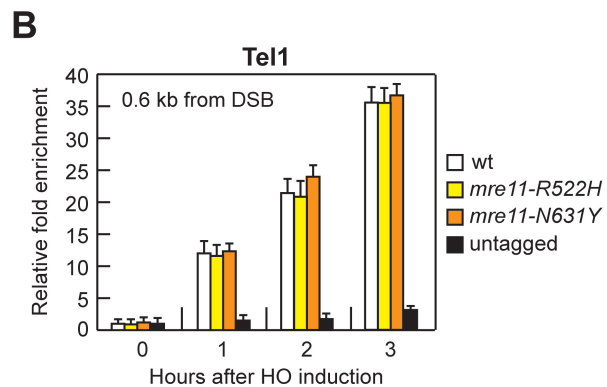

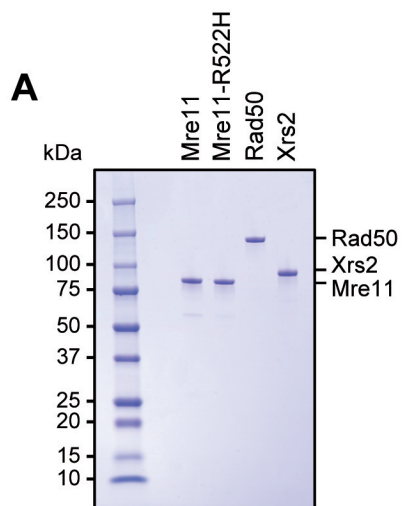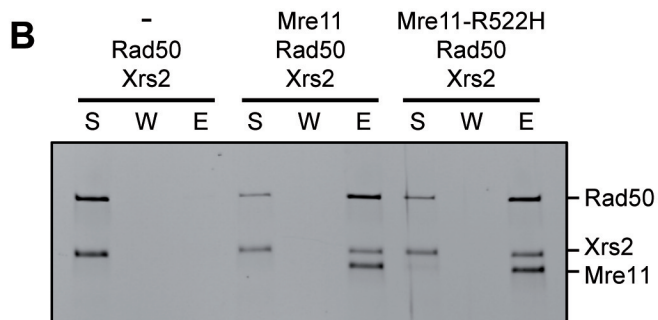

**Table S1.** Strains used in this study.

| Strain      | Relevant genotype                                                                                         | Source     |
|-------------|-----------------------------------------------------------------------------------------------------------|------------|
| W303        | <i>MATa/α ade2-1 can1-100 his3-11,15 leu2-3,112 trp1-1 ura3-1 rad5-535</i>                                |            |
| YLL3658.3   | <i>W303 MATa MRE11-HPH</i>                                                                                | This study |
| YLL1070.1   | <i>W303 MATa sae2Δ::HIS</i>                                                                               | This study |
| YLL1069.3   | <i>W303 MATa sae2Δ::KANMX</i>                                                                             | 1          |
| YLL3743.8   | <i>W303 MATa MRE11-H98Y-HPHMX sae2Δ::HIS3</i>                                                             | This study |
| YLL3760.1   | <i>W303 MATa MRE11-K292E-HPHMX sae2Δ::KANMX</i>                                                           | This study |
| YLL3735.4   | <i>W303 MATa MRE11-R389C-HPHMX sae2Δ::KANMX</i>                                                           | This study |
| YLL3766.1   | <i>W303 MATa MRE11-T426I-HPHMX sae2Δ::KANMX</i>                                                           | This study |
| YLL3736.2   | <i>W303 MATa MRE11-R522H-HPHMX sae2Δ::KANMX</i>                                                           | This study |
| YLL3737.1   | <i>W303 MATa MRE11-N631Y-HPHMX sae2Δ::KANMX</i>                                                           | This study |
| YLL3738.1   | <i>W303 MATa MRE11-R651X-HPHMX sae2Δ::KANMX</i>                                                           | This study |
| DMP6605/3C  | <i>W303 MATa MRE11-H98Y-HPHMX</i>                                                                         | This study |
| DMP6413/3D  | <i>W303 MATa MRE11-K292E-HPHMX</i>                                                                        | This study |
| DMP6562/2A  | <i>W303 MATa MRE11-R389C-HPHMX</i>                                                                        | This study |
| DMP6700/1A  | <i>W303 MATa MRE11-T426I-HPHMX</i>                                                                        | This study |
| DMP6441/1D  | <i>W303 MATa MRE11-R522H-HPHMX</i>                                                                        | This study |
| DMP6399/9C  | <i>W303 MATa MRE11-N631Y-HPHMX</i>                                                                        | This study |
| DMP6400/4C  | <i>W303 MATa MRE11-R651X-HPHMX</i>                                                                        | This study |
| DMP6041/6B  | <i>W303 MATa mre11-H125N::URA3 sae2Δ::KANMX</i>                                                           | This study |
| YLL4019.1   | <i>W303 MATa mre11-H98Y, H125N::URA3 sae2Δ::KANMX</i>                                                     | This study |
| YLL4020.2   | <i>W303 MATa mre11-H125N, K292E::URA3 sae2Δ::KANMX</i>                                                    | This study |
| YLL4021.1   | <i>W303 MATa mre11-H125N, R389C::URA3 sae2Δ::KANMX</i>                                                    | This study |
| DMP6082/6D  | <i>W303 MATa sae2Δ::KANMX exo1Δ::LEU2</i>                                                                 | This study |
| DMP6659/6C  | <i>W303 MATa MRE11-H98Y-HPHMX sae2Δ::KANMX exo1Δ::LEU2</i>                                                | This study |
| DMP6660/8A  | <i>W303 MATa MRE11-K292E-HPHMX sae2Δ::KANMX exo1Δ::LEU2</i>                                               | This study |
| DMP6661/6A  | <i>W303 MATa MRE11-R389C-HPHMX sae2Δ::KANMX exo1Δ::LEU2</i>                                               | This study |
| DMP6110/10A | <i>W303 MATa sae2Δ::KANMX dna2-1</i>                                                                      | This study |
| DMP6605/1C  | <i>W303 MATa sae2Δ::KANMX MRE11-H98Y-HPHMX dna2-1</i>                                                     | This study |
| DMP6658/10D | <i>W303 MATa sae2Δ::KANMX MRE11-K292E-HPHMX dna2-1</i>                                                    | This study |
| DMP6606/8A  | <i>W303 MATa sae2Δ::KANMX MRE11-R389C-HPHMX dna2-1</i>                                                    | This study |
| DMP5066/2A  | <i>W303 MATa sgs1Δ::TRP1</i>                                                                              | This study |
| JKM139      | <i>MATa hmlΔ::ADE1, hmrΔ::ADE1, ade1-100, lys5, leu2-3,112, trp1::hisG ura3-52, ho, ade3::GAL-HO site</i> | 2          |
| YLL3188.3   | <i>JKM139 MATa MRE11-3HA::URA3</i>                                                                        | This study |
| YLL3879.2   | <i>JKM139 MATa MRE11-H98Y-3HA::URA3</i>                                                                   | This study |
| YLL3868.1   | <i>JKM139 MATa MRE11-K292E-3HA::URA3</i>                                                                  | This study |
| YLL3880.6   | <i>JKM139 MATa MRE11-R389C-3HA::URA3</i>                                                                  | This study |
| YLL4022.1   | <i>JKM139 MATa MRE11-T426I-3HA::URA3</i>                                                                  | This study |



|             |                                                                   |            |
|-------------|-------------------------------------------------------------------|------------|
| YLL3841.2   | <i>JKM139 MATa MRE11-R522H-3HA::URA3</i>                          | This study |
| YLL3070.1   | <i>JKM139 MATa MRE11-N631Y-3HA::URA3</i>                          | This study |
| DMP6488/10B | <i>JKM139 MATa MRE11-R651X-3HA::URA3</i>                          | This study |
| YLL1523.3   | <i>JKM139 MATa sae2Δ::KANMX</i>                                   | 1          |
| DMP6574/9C  | <i>JKM139 MATa MRE11-H98Y-HPHMX</i>                               | This study |
| YLL3869.1   | <i>JKM139 MATa MRE11-H98Y-HPHMX sae2Δ::KANMX</i>                  | This study |
| DMP6414/1C  | <i>JKM139 MATa MRE11-K292E-HPHMX</i>                              | This study |
| YLL3768.11  | <i>JKM139 MATa MRE11-K292E-HPHMX sae2Δ::KANMX</i>                 | This study |
| DMP6556/1A  | <i>JKM139 MATa MRE11-R389C-HPHMX</i>                              | This study |
| YLL3739.1   | <i>JKM139 MATa MRE11-R389C-HPHMX sae2Δ::KANMX</i>                 | This study |
| DMP6401/9B  | <i>JKM139 MATa MRE11-R522H-HPHMX</i>                              | This study |
| YLL3740.4   | <i>JKM139 MATa MRE11-R522H-HPHMX sae2Δ::KANMX</i>                 | This study |
| DMP6415/9D  | <i>JKM139 MATa MRE11-N631Y-HPHMX</i>                              | This study |
| DMP6515/8C  | <i>JKM139 MATa MRE11-N631Y-HPHMX sae2Δ::KANMX</i>                 | This study |
| DMP6023/5A  | <i>JKM139 MATa SGS1-3HA::URA3</i>                                 | 1          |
| DMP6239/8C  | <i>JKM139 MATa SGS1-3HA::URA3 sae2Δ::KANMX</i>                    | This study |
| DMP6688/2C  | <i>JKM139 MATa SGS1-3HA::URA3 MRE11-H98Y-HPHMX</i>                | This study |
| DMP6647/2D  | <i>JKM139 MATa SGS1-3HA::URA3 MRE11-K292E-HPHMX</i>               | This study |
| DMP6689/4C  | <i>JKM139 MATa SGS1-3HA::URA3 MRE11-R389C-HPHMX</i>               | This study |
| DMP6688/4A  | <i>JKM139 MATa SGS1-3HA::URA3 MRE11-H98Y-HPHMX sae2Δ::KANMX</i>   | This study |
| DMP6647/7C  | <i>JKM139 MATa SGS1-3HA::URA3 MRE11-K292E-HPHMX sae2Δ::KANMX</i>  | This study |
| DMP6648/5D  | <i>JKM139 MATa SGS1-3HA::URA3 MRE11-R389C-HPHMX sae2Δ::KANMX</i>  | This study |
| YLL3421.2   | <i>JKM139 MATa RAD9-3HA::TRP1</i>                                 | This study |
| DMP6574/8A  | <i>JKM139 MATa RAD9-3HA::TRP1 MRE11-H98Y-HPHMX</i>                | This study |
| DMP6555/6B  | <i>JKM139 MATa RAD9-3HA::TRP1 MRE11-K292E-HPHMX</i>               | This study |
| DMP6557/6C  | <i>JKM139 MATa RAD9-3HA::TRP1 MRE11-R389C-HPHMX</i>               | This study |
| DMP6766/1A  | <i>JKM139 MATa RAD9-3HA::TRP1 MRE11-H98Y-HPHMX sae2Δ::KANMX</i>   | This study |
| DMP6767/2A  | <i>JKM139 MATa RAD9-3HA::TRP1 MRE11-K292E-HPHMX sae2Δ::KANMX</i>  | This study |
| DMP6768/3A  | <i>JKM139 MATa RAD9-3HA::TRP1 MRE11-R389C-HPHMX sae2Δ::KANMX</i>  | This study |
| DMP5816/1A  | <i>JKM139 MATa RAD9-3HA::TRP1 sae2Δ::KANMX</i>                    | 1          |
| YLL3222.6   | <i>JKM139 MATa TEL1-3HA::NATMX</i>                                | 1          |
| DMP6435/1A  | <i>JKM139 MATa TEL1-3HA::NATMX sae2Δ::KANMX</i>                   | This study |
| DMP6628/11C | <i>JKM139 MATa TEL1-3HA::NATMX MRE11-H98Y-HPHMX</i>               | This study |
| DMP6627/2D  | <i>JKM139 MATa TEL1-3HA::NATMX MRE11-K292E-HPHMX</i>              | This study |
| DMP6626/1C  | <i>JKM139 MATa TEL1-3HA::NATMX MRE11-R389C-HPHMX</i>              | This study |
| DMP6628/1B  | <i>JKM139 MATa TEL1-3HA::NATMX MRE11-H98Y-HPHMX sae2Δ::KANMX</i>  | This study |
| DMP6627/10D | <i>JKM139 MATa TEL1-3HA::NATMX MRE11-K292E-HPHMX sae2Δ::KANMX</i> | This study |

|            |                                                                                                                         |            |
|------------|-------------------------------------------------------------------------------------------------------------------------|------------|
| DMP6628/3B | <i>JKM139 MATa TEL1-3HA::NATMX MRE11-R389C-HPHMX sae2Δ::KANMX</i>                                                       | This study |
| YLL3572.11 | <i>JKM139 MATa XRS2-18MYC::TRP1</i>                                                                                     | This study |
| DMP6649/1C | <i>JKM139 MATa XRS2-18MYC::TRP1 MRE11-3HA::URA3</i>                                                                     | This study |
| DMP6669/1B | <i>JKM139 MATa XRS2-18MYC::TRP1 MRE11-H98Y-3HA::URA3</i>                                                                | This study |
| DMP6680/5A | <i>JKM139 MATa XRS2-18MYC::TRP1 MRE11-K292E-3HA::URA3</i>                                                               | This study |
| DMP6681/8C | <i>JKM139 MATa XRS2-18MYC::TRP1 MRE11-R389C-3HA::URA3</i>                                                               | This study |
| DMP6769/5A | <i>JKM139 MATa RAD9-3HA::TRP1 MRE11-R522H-HPHMX</i>                                                                     | This study |
| DMP6559/1C | <i>JKM139 MATa RAD9-3HA::TRP1 MRE11-N631Y-HPHMX</i>                                                                     | This study |
| DMP6463/3D | <i>JKM139 MATa TEL1-3HA::NATMX MRE11-R522H-HPHMX</i>                                                                    | This study |
| DMP6645/5D | <i>JKM139 MATa TEL1-3HA::NATMX MRE11-N631Y-HPHMX</i>                                                                    | This study |
| YJK40.6    | <i>MATΔ hmlΔ hmrΔ can1 lys5 ade2 leu2 trp1 ura3 his3 ade3::GAL-HO VII::TRP1-HO LacI-GFP::URA3 LacO::LYS5 LacO::KanR</i> | 3          |
| YLL4008.1  | <i>YJK40.6 MRE11-H98Y-HPHMX</i>                                                                                         | This study |
| YLL4001.1  | <i>YJK40.6 MRE11-K292E-HPHMX</i>                                                                                        | This study |
| YLL4002.4  | <i>YJK40.6 MRE11-R389C-HPHMX</i>                                                                                        | This study |
| YLL3811.1  | <i>YJK40.6 MRE11-R522H-HPHMX</i>                                                                                        | This study |
| YLL3812.2  | <i>YJK40.6 MRE11-N631Y-HPHMX</i>                                                                                        | This study |
| YLL1709.11 | <i>YJK40.6 sae2Δ::NATMX</i>                                                                                             | 4          |
| YLL4023.1  | <i>YJK40.6 MRE11-H98Y-HPHMX sae2Δ::NATMX</i>                                                                            | This study |
| YLL4014.3  | <i>YJK40.6 MRE11-K292E-HPHMX sae2Δ::NATMX</i>                                                                           | This study |
| YLL4022.4  | <i>YJK40.6 MRE11-R389C-HPHMX sae2Δ::NATMX</i>                                                                           | This study |
| YLL3820.2  | <i>YJK40.6 MRE11-R522H-HPHMX sae2Δ::NATMX</i>                                                                           | This study |
| YLL3821.4  | <i>YJK40.6 MRE11-N631Y-HPHMX sae2Δ::NATMX</i>                                                                           | This study |
| DMP6733    | <i>JKM139 MATa/α MRE11-18MYC::TRP1/MRE11-18MYC::TRP1</i>                                                                | This study |
| DMP6803    | <i>JKM139 MATa/α MRE11-3HA::URA3/MRE11-3HA::URA3</i>                                                                    | This study |
| DMP6734    | <i>JKM139 MATa/α MRE11-18MYC::TRP1/MRE11-3HA::URA3</i>                                                                  | This study |
| DMP6735    | <i>JKM139 MATa/α MRE11-H98Y-18MYC::TRP1/MRE11-H98Y-3HA::URA3</i>                                                        | This study |
| tGI354     | <i>ho hmlΔ::ADE1 MATa-inc hmrΔ::ADE1 adel leu2-3;112 lys5 trp1::hisG ura3-52 ade3::GAL::HO arg5,6::MATa::HPHMX</i>      | 5          |
| YLL3996.1  | <i>tGI354 MRE11-R522H-KANMX</i>                                                                                         | This study |
| YLL3964.4  | <i>tGI354 MRE11-R522H-KANMX sae2Δ::NATMX</i>                                                                            | This study |
| YLL3914.2  | <i>tGI354 sae2Δ::NATMX</i>                                                                                              | This study |

## References

- Gobbini,E., Villa,M., Gnugnoli,M., Menin,L., Clerici,M. and Longhese,M.P. (2015) Sae2 function at DNA double-strand breaks is bypassed by dampening Tell or Rad53 activity. *PLoS Genet.*, **11**, e1005685.

2. Lee,S.E., Moore,J.K., Holmes,A., Umezu,K., Kolodner,R.D. and Haber,J.E. (1998) *Saccharomyces* Ku70, Mre11/Rad50 and RPA proteins regulate adaptation to G2/M arrest after DNA damage. *Cell*, **94**, 399-409.
3. Kaye,J.A., Melo,J.A., Cheung,S.K., Vaze,M.B., Haber,J.E. and Toczyski,D.P. (2004) DNA breaks promote genomic instability by impeding proper chromosome segregation. *Curr. Biol.*, **14**, 2096-2106.
4. Clerici,M., Mantiero,D., Lucchini,G. and Longhese,M.P. (2005) The *Saccharomyces cerevisiae* Sae2 protein promotes resection and bridging of double strand break ends. *J. Biol. Chem.*, **280**, 38631-38638.
5. Saponaro,M., Callahan,D., Zheng,X., Krejci,L., Haber,J.E., Klein,H.L. and Liberi,G. (2010) Cdk1 targets Srs2 to complete synthesis-dependent strand annealing and to promote recombinational repair. *PLoS Genet.*, **6**, e1000858.

## SUPPLEMENTARY FIGURE LEGENDS

**Supplementary Figure S1.** Backbone root-mean-square deviation (RMSD) profiles for ScRad50-Mre11 tetramer (**A**) and ScMre11 dimer (**B**). RMSD is calculated using as reference structure the starting point structure of the dynamic.

**Supplementary Figure S2.** Structural alignment of Mre11 orthologs from *Homo sapiens* (PDB ID:3T1I), *Schizosaccharomyces pombe* (PDB ID:4FCX), *Chaetomium thermophilum* (PDB ID:4KYE and 5DA9 for RBD region), *Methanococcus jannaschii* (PDB ID:3AV0) and *Pyrococcus furiosus* (PDB ID:1II7) with ScMre11 structural model obtained in this work. Secondary structures are indicated, wherever the structure is available (otherwise the sequence is marked by a red rectangle), as follows: yellow rectangles, alpha helix; green rectangles, beta sheets. Alignment residues coloring is according to ClustalW style. The consensus sequence and histograms representing residue conservation and backbone RMSD are indicated on top. Functional regions of the proteins are indicated by open boxes: blue box, endonuclease domain; red box, capping domain; orange box, latching loop; purple box, Rad50-binding domain. Black open boxes highlight endonuclease motifs. Stars are represented above the consensus for Mg<sup>2+</sup> binding residues relevant for endonuclease activity; a red dot marks the catalytic His residue; green triangles indicate the residues identified for Xrs2/Nbs1 binding in SpMre11.

**Supplementary Figure S3.** Suppression in the JKM139 background. Exponentially growing cultures were serially diluted (1:10) and each dilution was spotted out onto YEPD plates with or without CPT or phleomycin at the indicated concentrations.

**Supplementary Figure S4.** Mre11-Xrs2 interaction. Protein extracts were analyzed by western blotting with anti-HA (Mre11), anti-Myc (Xrs2) antibodies either directly (Total) or after Mre11 immunoprecipitation (IPs) with anti-HA antibodies.

**Supplementary Figure S5.** H-bond and salt bridge analysis involving relevant residues during Mre11 dimer molecular dynamics. (A, B, D, E) Hydrogen bond existence maps of residues H98 (A), K292 (B) and R389 (D, E). Tables report the acceptor and donor groups for each hydrogen bond. The letters A and B indicate the two Mre11 monomers. (C) Salt bridges of H98 and R389 as a function of distance between oxygen atoms of acidic residues and the nitrogen atoms of basic residues. Salt bridge was considered formed if the distance between oxygen and nitrogen is within 4Å.

**Supplementary Figure S6.** Mre11-R522H and Mre11-N631Y do not affect Rad9 and Tel1 association to DSBs. (A, B) ChIP analysis. Exponentially growing YEPR cell cultures were transferred to YEPRG at time zero. Relative fold enrichment of the indicated fusion proteins at the indicated distances from the HO cleavage site was determined after ChIP with anti-HA antibody and subsequent qPCR analysis. Plotted values are the mean value with error bars denoting s.d. (n=3).

**Supplementary Figure S7.** Purification of Mre11-R522H and complex reconstitution. (A) Purified Mre11, Mre11-R522H, Rad50 and Xrs2 proteins were analyzed by SDS-PAGE and Coomassie blue staining. (B) 6xHis tagged Mre11 or Mre11-R522H (0.9 µg of each) was incubated

with Rad50 (1.5  $\mu$ g) and Xrs2 (1  $\mu$ g) and protein complexes were captured by Ni-NTA agarose. The supernatant (S) containing unbound proteins, the wash (W), and the eluate (E) fractions were analyzed by SDS-PAGE and Oriole fluorescent gel staining.

## **SUPPLEMENTARY FILES**

**Supplementary File 1.** PDB file of the structure of the most populated cluster for ScRad50-Mre11 tetramer.

**Supplementary File 2.** PDB file of the structure of the most populated cluster for ScMre11 dimer.
